# Supplementary material for: Evaluation of Cross-Immunity to the Mpox Virus Due to Historic Smallpox Vaccination
Source: MDPI journal article supplement (doi:10.3390/vaccines11101541), 2023-09-28
Supplement: s1 [file s1]

**Supplementary Table S1 anti-MPXV IgG and Nabs titre comparison after stratification based on HDs year of birth**

| <b>Born between (years)</b> | <b>IgG reactive (N)</b>  | <b>Ig G Fisher test vs 1950-1957</b> | <b>IgG Fisher test vs 1958-1965</b>  | <b>IgG Fisher test vs 1950-1965</b>  |
|-----------------------------|--------------------------|--------------------------------------|--------------------------------------|--------------------------------------|
| <b>1950-1957</b>            | 20 (22)                  | n.a                                  | p=0.240                              | n.a.                                 |
| <b>1958-1965</b>            | 16 (21)                  | p=0.240                              | n.a                                  | n.a.                                 |
| <b>1966-1973</b>            | 24 (24)                  | p=0.220                              | p=0.017                              | p=0.044                              |
| <b>Born between (years)</b> | <b>Nabs reactive (N)</b> | <b>Nabs Fisher test vs 1950-1957</b> | <b>Nabs Fisher test vs 1958-1965</b> | <b>Nabs Fisher test vs 1950-1965</b> |
| <b>1950-1957</b>            | 14 (22)                  | n.a                                  | p=0.759                              | n.a.                                 |
| <b>1958-1965</b>            | 12 (21)                  | p=0.759                              | n.a                                  | n.a.                                 |
| <b>1966-1973</b>            | 21 (24)                  | p=0.081                              | p=0.041                              | p=0.026                              |

**Abbreviations.** HDs: healthy donors; Nabs: Neutralizing Antibodies; n.a.: not applicable
